# Supplementary material for: Developing effective electronic-only coupled-cluster and Møller–Plesset perturbation theories for the muonic molecules
Source: Royal Society of Chemistry journal article supplement (doi:10.1039/c8cp02489h), 2018-01-01
Supplement: c8cp02489h1.pdf [file c8cp02489h1.pdf]

# Supporting Information

## Developing effective electronic-only coupled-cluster and Møller-Plesset perturbation theories for the muonic molecules

Mohammad Goli<sup>1,\*</sup> and Shant Shahbazian<sup>2,\*</sup>

<sup>1</sup> *School of Nano Science, Institute for Research in Fundamental Sciences (IPM),  
Tehran 19395-5531, Iran*

<sup>2</sup> *Department of Physics, Shahid Beheshti University, G. C., Evin, Tehran, Iran,  
19839, P.O. Box 19395-4716.*

E-mails:

Mohammad Goli: [m\\_goli@ipm.ir](mailto:m_goli@ipm.ir)

Shant Shahbazian: [sh\\_shahbazian@sbu.ac.ir](mailto:sh_shahbazian@sbu.ac.ir)

\* Corresponding authors

## Table of contents

**Pages 3: Table S1-** The distance between hydrogen and central atoms computed at both HF and post-HF levels (in Angstroms) for hydrides.

**Page 4: Table S2-** The difference (in Angstroms) between the muonic bond lengths (in Table 1) and the analog bond lengths in hydrides (in Table S1).

**Page 5: Table S3-** The bond lengths of the vicinal clamped hydrogen to the central atoms computed at both HF and post-HF levels (in Angstroms) for the muonic species.

**Page 6: Table S4-** The total energies at corresponding optimized geometries (in Hartrees) for the muonic species and the analog hydrides.

**Page 7: Table S5-** The total energies (in Hartrees) for the hydrogenated and the muoniated adducts (for details see the main text).

**Page 8-9:** The Cartesian coordinates (in Angstroms) of the optimized NH parent divalent structures depicted in Figure 3 in the main text at B3LYP/aug-cc-pVTZ level.

**Page 9-11:** The Cartesian coordinates (in Angstroms) of the optimized hydrogen adduct of the parent divalent structures depicted in Figure 4 in the main text at RO-B3LYP/aug-cc-pVTZ level (for the used nomenclature see the main text).

**Page 12-14:** The Cartesian coordinates (in Angstroms) of the optimized muonium adduct of the parent divalent structures depicted in Figure 5 in the main text at RO-EB3LYP/aug-cc-pVTZ level (for the used nomenclature see the main text).

Table S1- The distance between hydrogen and central atoms computed at both HF and post-HF levels (in Angstroms) for hydrides.

|                        | <b>HF</b> | <b>MP2</b> | <b>CCSD</b> | <b>CCSD(T)</b> |
|------------------------|-----------|------------|-------------|----------------|
| <b>LiH</b>             | 1.607     | 1.604      | 1.610       | 1.610          |
| <b>BeH<sub>2</sub></b> | 1.331     | 1.329      | 1.333       | 1.333          |
| <b>BH<sub>3</sub></b>  | 1.188     | 1.187      | 1.191       | 1.191          |
| <b>CH<sub>4</sub></b>  | 1.082     | 1.086      | 1.088       | 1.090          |
| <b>NH<sub>3</sub></b>  | 0.999     | 1.012      | 1.012       | 1.015          |
| <b>H<sub>2</sub>O</b>  | 0.941     | 0.961      | 0.959       | 0.962          |
| <b>FH</b>              | 0.899     | 0.921      | 0.918       | 0.921          |
| <b>NaH</b>             | 1.919     | 1.918      | 1.926       | 1.926          |
| <b>MgH<sub>2</sub></b> | 1.708     | 1.706      | 1.712       | 1.713          |
| <b>AlH<sub>3</sub></b> | 1.581     | 1.580      | 1.585       | 1.585          |
| <b>SiH<sub>4</sub></b> | 1.478     | 1.478      | 1.482       | 1.483          |
| <b>PH<sub>3</sub></b>  | 1.408     | 1.412      | 1.417       | 1.419          |
| <b>H<sub>2</sub>S</b>  | 1.330     | 1.336      | 1.340       | 1.342          |
| <b>HCl</b>             | 1.268     | 1.275      | 1.277       | 1.279          |

Table S2- The difference (in Angstroms) between the muonic bond lengths (in Table 1) and the analog bond lengths in hydrides (in Table S1).

|                                          | <b>EHF-HF</b> | <b>EMP2-MP2</b> | <b>ECCSD-CCSD</b> | <b>ECCSD(T)-CCSD(T)</b> |
|------------------------------------------|---------------|-----------------|-------------------|-------------------------|
| <b>LiMu-LiH</b>                          | 0.089         | 0.085           | 0.083             | 0.083                   |
| <b>BeHMu-BeH<sub>2</sub></b>             | 0.082         | 0.080           | 0.078             | 0.078                   |
| <b>BH<sub>2</sub>Mu-BeH<sub>3</sub></b>  | 0.077         | 0.070           | 0.071             | 0.070                   |
| <b>CH<sub>3</sub>Mu-CH<sub>4</sub></b>   | 0.069         | 0.062           | 0.061             | 0.060                   |
| <b>NH<sub>2</sub>Mu-NH<sub>3</sub></b>   | 0.061         | 0.046           | 0.046             | 0.044                   |
| <b>OHMu-H<sub>2</sub>O</b>               | 0.056         | 0.036           | 0.038             | 0.036                   |
| <b>FMu-FH</b>                            | 0.055         | 0.033           | 0.036             | 0.034                   |
| <b>NaMu-NaH</b>                          | 0.079         | 0.075           | 0.072             | 0.072                   |
| <b>MgHMu-MgH<sub>2</sub></b>             | 0.083         | 0.078           | 0.074             | 0.074                   |
| <b>AlH<sub>2</sub>Mu-AlH<sub>3</sub></b> | 0.083         | 0.078           | 0.075             | 0.074                   |
| <b>SiH<sub>3</sub>Mu-SiH<sub>4</sub></b> | 0.081         | 0.075           | 0.073             | 0.072                   |
| <b>PH<sub>2</sub>Mu-PH<sub>3</sub></b>   | 0.081         | 0.072           | 0.068             | 0.067                   |
| <b>SHMu-H<sub>2</sub>S</b>               | 0.076         | 0.064           | 0.062             | 0.059                   |
| <b>MuCl-HCl</b>                          | 0.074         | 0.061           | 0.059             | 0.057                   |

Table S3- The bond lengths of the vicinal clamped hydrogen to the central atoms computed at both HF and post-HF levels (in Angstroms) for the muonic species.

|                          | <b>EHF</b> | <b>EMP2</b> | <b>ECCSD</b> | <b>ECCSD(T)</b> |
|--------------------------|------------|-------------|--------------|-----------------|
| <b>LiMu</b>              | --         | --          | --           | --              |
| <b>BeHMu</b>             | 1.332      | 1.330       | 1.334        | 1.334           |
| <b>BH<sub>2</sub>Mu</b>  | 1.187      | 1.185       | 1.191        | 1.192           |
| <b>CH<sub>3</sub>Mu</b>  | 1.082      | 1.086       | 1.088        | 1.089           |
| <b>NH<sub>2</sub>Mu</b>  | 0.999      | 1.012       | 1.012        | 1.015           |
| <b>OHMu</b>              | 0.941      | 0.962       | 0.959        | 0.962           |
| <b>FMu</b>               | --         | --          | --           | --              |
| <b>NaMu</b>              | --         | --          | --           | --              |
| <b>MgHMu</b>             | 1.708      | 1.707       | 1.713        | 1.714           |
| <b>AlH<sub>2</sub>Mu</b> | 1.582      | 1.581       | 1.585        | 1.586           |
| <b>SiH<sub>3</sub>Mu</b> | 1.478      | 1.478       | 1.482        | 1.484           |
| <b>PH<sub>2</sub>Mu</b>  | 1.408      | 1.413       | 1.417        | 1.420           |
| <b>SHMu</b>              | 1.330      | 1.337       | 1.340        | 1.343           |
| <b>MuCl</b>              | --         | --          | --           | --              |

Table S4- The total energies at corresponding optimized geometries (in Hartrees) for the muonic species and the analog hydrides.\*

|                          | <b>EHF</b> | <b>EMP2</b> | <b>ECCSD</b> | <b>ECCSD(T)</b> |
|--------------------------|------------|-------------|--------------|-----------------|
| <b>LiMu</b>              | -7.8917    | -7.9185     | -7.9265      | -7.9265         |
| <b>BeHMu</b>             | -15.6687   | -15.7300    | -15.7452     | -15.7459        |
| <b>BH<sub>2</sub>Mu</b>  | -26.2914   | -26.4070    | -26.4284     | -26.4312        |
| <b>CH<sub>3</sub>Mu</b>  | -40.1034   | -40.3067    | -40.3258     | -40.3326        |
| <b>NH<sub>2</sub>Mu</b>  | -56.1117   | -56.3551    | -56.3655     | -56.3742        |
| <b>OHMu</b>              | -75.9552   | -76.2281    | -76.2314     | -76.2405        |
| <b>FMu</b>               | -99.9606   | -100.2464   | -100.2464    | -100.2543       |
| <b>NaMu</b>              | -162.2992  | -162.3259   | -162.3344    | -162.3344       |
| <b>MgHMu</b>             | -200.6408  | -200.6986   | -200.7143    | -200.7148       |
| <b>AlH<sub>2</sub>Mu</b> | -243.5433  | -243.6393   | -243.6623    | -243.6641       |
| <b>SiH<sub>3</sub>Mu</b> | -291.1569  | -291.3041   | -291.3332    | -291.3375       |
| <b>PH<sub>2</sub>Mu</b>  | -342.3847  | -342.5597   | -342.5869    | -342.5943       |
| <b>SHMu</b>              | -398.6128  | -398.8097   | -398.8321    | -398.8410       |
| <b>MuCl</b>              | -460.0102  | -460.2200   | -460.2384    | -460.2472       |
|                          | <b>HF</b>  | <b>MP2</b>  | <b>CCSD</b>  | <b>CCSD(T)</b>  |
| <b>LiH</b>               | -7.9870    | -8.0153     | -8.0234      | -8.0234         |
| <b>BeH<sub>2</sub></b>   | -15.7721   | -15.8341    | -15.8492     | -15.8498        |
| <b>BH<sub>3</sub></b>    | -26.4004   | -26.5157    | -26.5370     | -26.5397        |
| <b>CH<sub>4</sub></b>    | -40.2139   | -40.4157    | -40.4354     | -40.4420        |
| <b>NH<sub>3</sub></b>    | -56.2211   | -56.4620    | -56.4735     | -56.4819        |
| <b>H<sub>2</sub>O</b>    | -76.0617   | -76.3312    | -76.3358     | -76.3445        |
| <b>FH</b>                | -100.0623  | -100.3446   | -100.3458    | -100.3534       |
| <b>NaH</b>               | -162.3912  | -162.4197   | -162.4286    | -162.4286       |
| <b>MgH<sub>2</sub></b>   | -200.7384  | -200.7972   | -200.8132    | -200.8136       |
| <b>AlH<sub>3</sub></b>   | -243.6453  | -243.7418   | -243.7649    | -243.7666       |
| <b>SiH<sub>4</sub></b>   | -291.2616  | -291.4085   | -291.4378    | -291.4419       |
| <b>PH<sub>3</sub></b>    | -342.4885  | -342.6625   | -342.6903    | -342.6974       |
| <b>H<sub>2</sub>S</b>    | -398.7143  | -398.9101   | -398.9334    | -398.9420       |
| <b>HCl</b>               | -460.1080  | -460.3171   | -460.3366    | -460.3452       |

\* Note that the correlation energies reported in Table 2 of the main text is *not* the difference between the EHF/HF and post-EHF/HF total energies reported in this table, which are computed at different optimized geometries. The correlation energies in Table 2 are the difference between post-EHF/HF and the EHF/HF energies at the corresponding post-EHF/HF optimized geometries.

Table S5- The total energies (in Hartrees) for the hydrogenated and the muoniated adducts (for details see the main text).

|                   | <b>B3LYP</b>  | <b>MP2</b>  | <b>CCSD</b>  |
|-------------------|---------------|-------------|--------------|
| <b>H-cC-NHC</b>   | -226.84088    | -226.31437  | -226.33621   |
| <b>H-aC-NHC</b>   | -226.81870    | -226.28751  | -226.31704   |
| <b>H-N-TAC</b>    | -243.22921    | -242.69246  | -242.70513   |
| <b>H-C-TAC</b>    | -243.22332    | -242.67744  | -242.70177   |
| <b>H-Si-NHSi</b>  | -478.31277    | -477.40208  | -477.42712   |
| <b>H-C-NHSi</b>   | -478.30383    | -477.39391  | -477.42554   |
| <b>H-Ge-NHGe</b>  | -2265.87997   | -2263.85457 | -2263.87800  |
| <b>H-C-NHGe</b>   | -2265.87359   | -2263.84930 | -2263.87687  |
|                   | <b>EB3LYP</b> | <b>EMP2</b> | <b>ECCSD</b> |
| <b>Mu-cC-NHC</b>  | -226.73044    | -226.20609  | -226.22674   |
| <b>Mu-aC-NHC</b>  | -226.70817    | -226.17889  | -226.20742   |
| <b>Mu-N-TAC</b>   | -243.12379    | -242.59041  | -242.60056   |
| <b>Mu-C-TAC</b>   | -243.11531    | -242.57072  | -242.59446   |
| <b>Mu-Si-NHSi</b> | -478.20860    | -477.29928  | -477.32386   |
| <b>Mu-C-NHSi</b>  | -478.19280    | -477.28469  | -477.31536   |
| <b>Mu-Ge-NHGe</b> | -2265.77793   | -2263.75430 | -2263.77682  |
| <b>Mu-C-NHGe</b>  | -2265.76280   | -2263.74025 | -2263.76676  |

**parent N-Heterocyclic carbene (NHC)**

| atom | X         | Y        | Z         |
|------|-----------|----------|-----------|
| C    | 0.070944  | 0.000000 | -0.001735 |
| H    | -0.075400 | 0.000000 | 1.062793  |
| C    | 1.204366  | 0.000000 | -0.735965 |
| H    | 2.235705  | 0.000000 | -0.434344 |
| N    | 0.790425  | 0.000000 | -2.062069 |
| H    | 1.413779  | 0.000000 | -2.848918 |
| N    | -0.970072 | 0.000000 | -0.921622 |
| H    | -1.942998 | 0.000000 | -0.674405 |
| C    | -0.562129 | 0.000000 | -2.220938 |

**parent N-Heterocyclic silylene (NHSi)**

| atom | X         | Y        | Z         |
|------|-----------|----------|-----------|
| C    | 0.048524  | 0.000000 | -0.035639 |
| H    | -0.013346 | 0.000000 | 1.040245  |
| C    | 1.182589  | 0.000000 | -0.770287 |
| H    | 2.189757  | 0.000000 | -0.386927 |
| N    | 0.921378  | 0.000000 | -2.132281 |
| H    | 1.700681  | 0.000000 | -2.768784 |
| N    | -1.087680 | 0.000000 | -0.830813 |
| H    | -1.987148 | 0.000000 | -0.379807 |
| Si   | -0.790134 | 0.000000 | -2.572907 |

**parent N-Heterocyclic germylene (NHGe)**

| atom | X         | Y        | Z         |
|------|-----------|----------|-----------|
| C    | 0.040559  | 0.000000 | -0.043083 |
| H    | 0.002864  | 0.000000 | 1.035062  |
| C    | 1.179051  | 0.000000 | -0.780599 |
| H    | 2.178401  | 0.000000 | -0.374251 |
| N    | 0.958486  | 0.000000 | -2.139720 |
| H    | 1.758559  | 0.000000 | -2.750829 |
| N    | -1.109639 | 0.000000 | -0.799989 |
| H    | -1.994423 | 0.000000 | -0.319647 |
| Ge   | -0.849238 | 0.000000 | -2.664145 |



### triazolium cation (TAC)

| atom | X         | Y        | Z         |
|------|-----------|----------|-----------|
| C    | 0.064639  | 0.000000 | 0.004819  |
| H    | -0.104264 | 0.000000 | 1.066989  |
| C    | 1.212923  | 0.000000 | -0.739038 |
| H    | 2.251332  | 0.000000 | -0.458973 |
| N    | 0.786060  | 0.000000 | -2.027153 |
| H    | 1.342821  | 0.000000 | -2.874602 |
| N    | -0.936424 | 0.000000 | -0.911334 |
| H    | -1.937429 | 0.000000 | -0.749660 |
| N    | -0.515037 | 0.000000 | -2.148248 |

### H-cC-NHC

| atom | X         | Y         | Z         |
|------|-----------|-----------|-----------|
| C    | 0.671566  | 0.978634  | -0.005403 |
| H    | 1.353582  | 1.809759  | 0.009675  |
| C    | -0.671567 | 0.978633  | -0.005404 |
| H    | -1.353584 | 1.809757  | 0.009675  |
| N    | -1.117536 | -0.343232 | 0.071695  |
| H    | -2.006349 | -0.598628 | -0.326600 |
| N    | 1.117536  | -0.343230 | 0.071695  |
| H    | 2.006350  | -0.598625 | -0.326600 |
| C    | 0.000001  | -1.201322 | -0.119089 |
| H    | 0.000001  | -2.153033 | 0.406653  |

### H-aC-NHC

| atom | X         | Y         | Z         |
|------|-----------|-----------|-----------|
| C    | 0.486518  | -1.044784 | -0.197995 |
| H    | 0.891583  | -1.967560 | -0.573209 |
| N    | -0.875293 | -0.771218 | -0.178251 |
| H    | -1.585672 | -1.475495 | -0.258924 |
| N    | -0.004509 | 1.141233  | 0.106789  |
| H    | 0.074829  | 2.131291  | 0.246710  |
| C    | -1.201036 | 0.539529  | 0.030948  |
| C    | 1.172540  | 0.271016  | -0.069760 |
| H    | 1.854650  | 0.335280  | 0.787897  |
| H    | 1.752871  | 0.555374  | -0.960374 |

### H-Si-NHSi

| atom | X         | Y         | Z         |
|------|-----------|-----------|-----------|
| C    | -1.284279 | 0.679186  | 0.010600  |
| H    | -2.163743 | 1.299937  | -0.047200 |
| C    | -1.284279 | -0.679188 | 0.010579  |
| H    | -2.163742 | -1.299938 | -0.047231 |
| N    | -0.020097 | -1.228519 | 0.055331  |
| H    | 0.070784  | -2.225552 | -0.033477 |
| N    | -0.020096 | 1.228518  | 0.055323  |
| H    | 0.070787  | 2.225551  | -0.033494 |
| Si   | 1.271695  | -0.000002 | -0.132177 |
| H    | 2.042087  | 0.000006  | 1.174246  |

### H-C-NHSi

| atom | X         | Y         | Z         |
|------|-----------|-----------|-----------|
| C    | 1.143943  | -0.861844 | 0.000000  |
| H    | 1.935578  | -1.592377 | 0.000000  |
| N    | -0.180305 | -1.220611 | 0.000000  |
| H    | -0.404105 | -2.202422 | 0.000000  |
| N    | -0.000019 | 1.186920  | 0.000000  |
| H    | -0.061640 | 2.190918  | 0.000000  |
| Si   | -1.358639 | 0.101079  | 0.000000  |
| C    | 1.350083  | 0.616694  | 0.000000  |
| H    | 1.926760  | 0.949178  | 0.878447  |
| H    | 1.926760  | 0.949178  | -0.878447 |

### H-Ge-NHGe

| atom | X         | Y         | Z         |
|------|-----------|-----------|-----------|
| C    | -1.712638 | 0.691910  | -0.008819 |
| H    | -2.617521 | 1.277233  | -0.092619 |
| C    | -1.712636 | -0.691912 | -0.008823 |
| H    | -2.617515 | -1.277240 | -0.092626 |
| N    | -0.501294 | -1.270568 | 0.071946  |
| H    | -0.452687 | -2.273328 | -0.010462 |
| N    | -0.501297 | 1.270569  | 0.071943  |
| H    | -0.452691 | 2.273332  | -0.010465 |
| Ge   | 1.010729  | 0.000000  | -0.068399 |
| H    | 1.366874  | 0.000003  | 1.493561  |

### H-C-NHGe

| atom | X         | Y         | Z         |
|------|-----------|-----------|-----------|
| C    | -0.775185 | -1.638381 | 0.000000  |
| H    | -1.425510 | -2.499697 | 0.000000  |
| N    | -1.263398 | -0.379850 | 0.000000  |
| H    | -2.265202 | -0.265742 | 0.000000  |
| N    | 1.218351  | -0.370197 | 0.000000  |
| H    | 2.219021  | -0.264855 | 0.000000  |
| Ge   | 0.000850  | 1.036347  | 0.000000  |
| C    | 0.715228  | -1.738472 | 0.000000  |
| H    | 1.071160  | -2.306866 | 0.877407  |
| H    | 1.071160  | -2.306866 | -0.877407 |

### H-N-TAC

| atom | X         | Y         | Z         |
|------|-----------|-----------|-----------|
| C    | -0.680487 | 0.992095  | 0.008361  |
| H    | -1.375698 | 1.812736  | -0.009311 |
| C    | 0.680492  | 0.992092  | 0.008362  |
| H    | 1.375708  | 1.812729  | -0.009308 |
| N    | 1.097529  | -0.304909 | 0.048048  |
| H    | 1.990096  | -0.648849 | -0.283385 |
| N    | -1.097530 | -0.304904 | 0.048049  |
| H    | -1.990100 | -0.648839 | -0.283383 |
| N    | -0.000003 | -1.151603 | -0.107844 |
| H    | -0.000005 | -1.916289 | 0.569785  |

### H-C-TAC

| atom | X         | Y         | Z         |
|------|-----------|-----------|-----------|
| C    | 0.523599  | -1.054702 | 0.000008  |
| H    | 0.944408  | -2.045400 | 0.000328  |
| N    | -0.778609 | -0.819784 | -0.000175 |
| H    | -1.527564 | -1.504503 | -0.000051 |
| N    | -0.000131 | 1.112835  | 0.000116  |
| H    | -0.041099 | 2.122330  | 0.000408  |
| N    | -1.132251 | 0.456859  | -0.000161 |
| C    | 1.199589  | 0.270335  | -0.000007 |
| H    | 1.827688  | 0.444663  | 0.884052  |
| H    | 1.827179  | 0.444014  | -0.884519 |

### Mu-cC-NHC

| atom | X         | Y         | Z         |
|------|-----------|-----------|-----------|
| C    | 0.671609  | 0.985203  | -0.006768 |
| H    | 1.353921  | 1.816064  | 0.013696  |
| C    | -0.671495 | 0.985210  | -0.007292 |
| H    | -1.353850 | 1.816065  | 0.013113  |
| N    | -1.115712 | -0.337112 | 0.063533  |
| H    | -2.005644 | -0.594382 | -0.331208 |
| N    | 1.115895  | -0.337254 | 0.064172  |
| H    | 2.005225  | -0.594116 | -0.332052 |
| C    | 0.000041  | -1.199165 | -0.117447 |
| Bq   | 0.000011  | -2.201800 | 0.426548  |

### Mu-aC-NHC

| atom | X         | Y         | Z         |
|------|-----------|-----------|-----------|
| C    | 0.483972  | -1.045086 | -0.182049 |
| H    | 0.890641  | -1.970403 | -0.549491 |
| N    | -0.878317 | -0.769807 | -0.186302 |
| H    | -1.587997 | -1.473553 | -0.277234 |
| N    | -0.007864 | 1.137098  | 0.125869  |
| H    | 0.071330  | 2.128157  | 0.258516  |
| C    | -1.205114 | 0.539353  | 0.027770  |
| C    | 1.167097  | 0.268116  | -0.061458 |
| H    | 1.863361  | 0.335704  | 0.782592  |
| Bq   | 1.769370  | 0.565087  | -1.004384 |

### Mu-Si-NHSi

| atom | X         | Y         | Z         |
|------|-----------|-----------|-----------|
| C    | -1.289712 | 0.678870  | 0.008953  |
| H    | -2.169042 | 1.300999  | -0.033849 |
| C    | -1.289771 | -0.678978 | 0.008890  |
| H    | -2.169252 | -1.300932 | -0.033626 |
| N    | -0.023904 | -1.226537 | 0.033410  |
| H    | 0.068124  | -2.224311 | -0.045004 |
| N    | -0.023810 | 1.226315  | 0.033545  |
| H    | 0.068428  | 2.224089  | -0.044579 |
| Si   | 1.270107  | -0.000157 | -0.148462 |
| Bq   | 2.077949  | 0.000643  | 1.233223  |

### Mu-C-NHSi

| atom | X         | Y         | Z         |
|------|-----------|-----------|-----------|
| C    | 1.139992  | -0.860289 | 0.059105  |
| H    | 1.932048  | -1.589876 | 0.023282  |
| N    | -0.182138 | -1.221086 | -0.016394 |
| H    | -0.404259 | -2.203137 | -0.031161 |
| N    | -0.003534 | 1.184604  | 0.035850  |
| H    | -0.065399 | 2.188502  | 0.027486  |
| Si   | -1.361759 | 0.099034  | -0.028738 |
| C    | 1.344693  | 0.612792  | 0.013394  |
| H    | 1.952455  | 0.969817  | 0.856777  |
| Bq   | 1.926316  | 0.936352  | -0.939601 |

### Mu-Ge-NHGe

| atom | X         | Y         | Z         |
|------|-----------|-----------|-----------|
| C    | -1.718225 | 0.690833  | -0.011272 |
| H    | -2.622440 | 1.278367  | -0.083779 |
| C    | -1.718249 | -0.690733 | -0.010428 |
| H    | -2.622495 | -1.278487 | -0.080928 |
| N    | -0.502970 | -1.268065 | 0.055538  |
| H    | -0.452245 | -2.270997 | -0.021511 |
| N    | -0.502846 | 1.267953  | 0.054289  |
| H    | -0.452311 | 2.271192  | -0.018854 |
| Ge   | 1.002727  | -0.000138 | -0.085374 |
| Bq   | 1.394116  | 0.000073  | 1.553497  |

### Mu-C-NHGe

| atom | X         | Y         | Z         |
|------|-----------|-----------|-----------|
| C    | -0.772806 | -1.633089 | 0.060746  |
| H    | -1.421981 | -2.495241 | 0.083493  |
| N    | -1.262712 | -0.380362 | -0.036875 |
| H    | -2.264817 | -0.268648 | -0.049083 |
| N    | 1.215789  | -0.367904 | 0.085998  |
| H    | 2.215268  | -0.262505 | 0.033980  |
| Ge   | 0.001070  | 1.038577  | -0.054143 |
| C    | 0.710182  | -1.731481 | 0.013141  |
| H    | 1.092013  | -2.363305 | 0.828301  |
| Bq   | 1.054469  | -2.270622 | -0.965557 |

### Mu-N-TAC

| atom | X         | Y         | Z         |
|------|-----------|-----------|-----------|
| C    | -0.679135 | 0.998900  | 0.006222  |
| H    | -1.375781 | 1.818190  | -0.010165 |
| C    | 0.679177  | 0.998870  | 0.006124  |
| H    | 1.375732  | 1.818224  | -0.010577 |
| N    | 1.096153  | -0.300885 | 0.048452  |
| H    | 1.985632  | -0.643870 | -0.291657 |
| N    | -1.096255 | -0.300853 | 0.048729  |
| H    | -1.985453 | -0.643815 | -0.292129 |
| N    | -0.000060 | -1.147538 | -0.096295 |
| Bq   | -0.000007 | -1.962965 | 0.580669  |

### Mu-C-TAC

| atom | X         | Y         | Z         |
|------|-----------|-----------|-----------|
| C    | 0.519816  | -1.052118 | 0.012546  |
| H    | 0.940987  | -2.042548 | 0.016560  |
| N    | -0.782688 | -0.820130 | -0.003537 |
| H    | -1.529556 | -1.506783 | -0.013073 |
| N    | -0.004098 | 1.111149  | 0.016891  |
| H    | -0.045134 | 2.120307  | 0.010394  |
| N    | -1.139098 | 0.455349  | -0.004343 |
| C    | 1.192371  | 0.268721  | 0.008073  |
| H    | 1.833921  | 0.444832  | 0.881352  |
| Bq   | 1.856288  | 0.447870  | -0.924863 |
